# Supplementary material for: Using protein microarray technology to screen anti-ERCC1 monoclonal antibodies for specificity and applications in pathology
Source: PubMed Central journal article supplement (PMC3526464; doi:10.1186/1472-6750-12-88), 2012-11-21

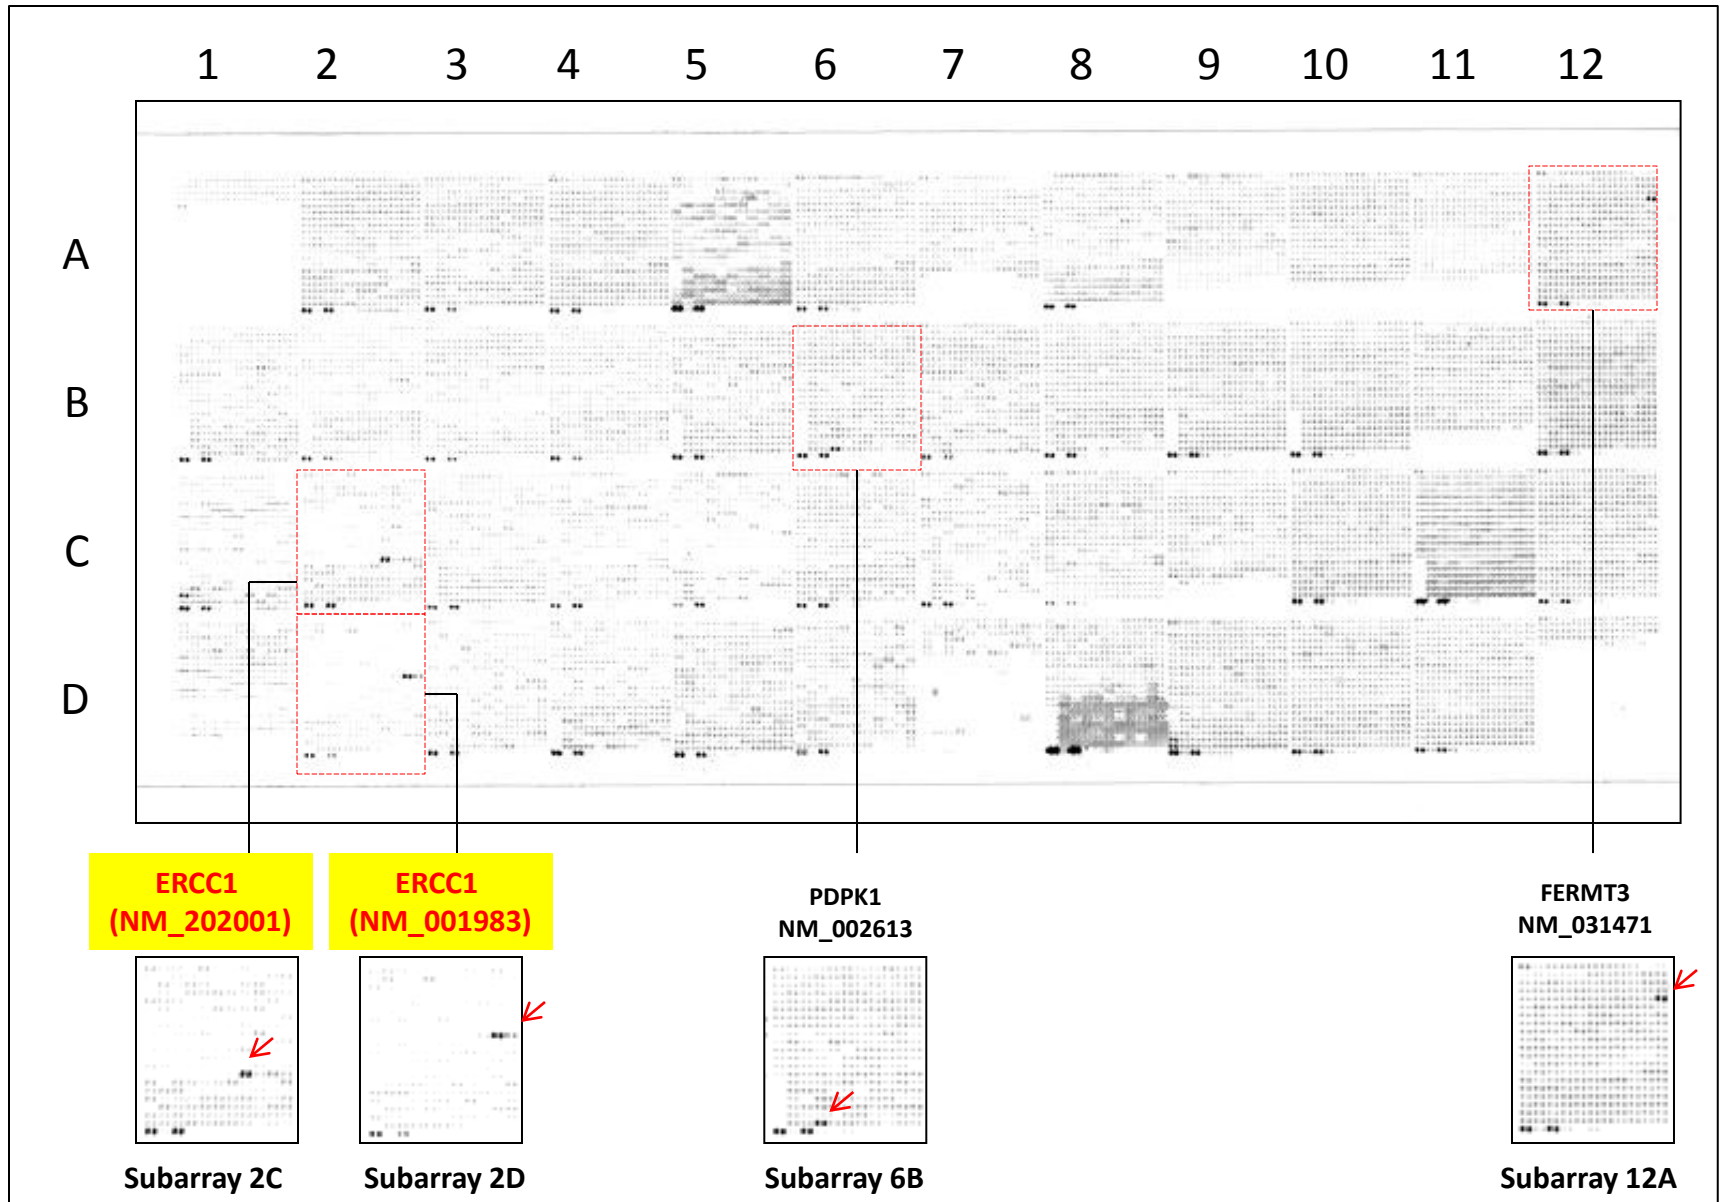

Supplement: 1472-6750-12-88-S1.pdf [file 1472-6750-12-88-S1.pdf]
