# Supplementary material for: Using protein microarray technology to screen anti-ERCC1 monoclonal antibodies for specificity and applications in pathology
Source: PubMed Central journal article supplement (PMC3526464; doi:10.1186/1472-6750-12-88), 2012-11-21
Supplement: 1472-6750-12-88-S4.pdf [file 1472-6750-12-88-S4.pdf]

Donghui Ma, Figure S3B

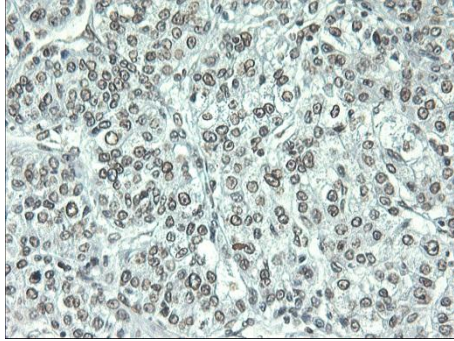

Carcinoma of liver

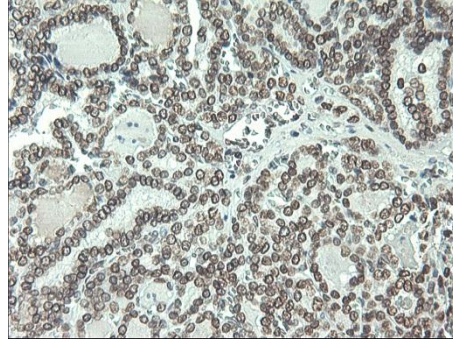

Carcinoma of thyroid

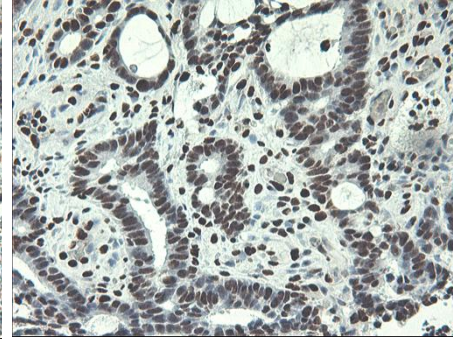

Adenocarcinoma of colon

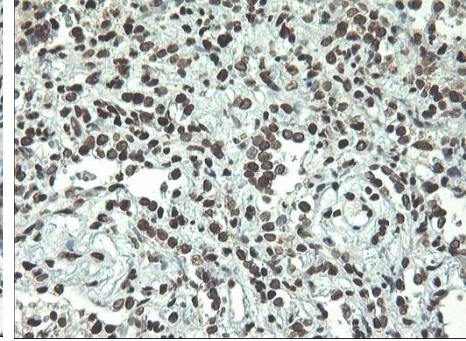

Carcinoma of lung

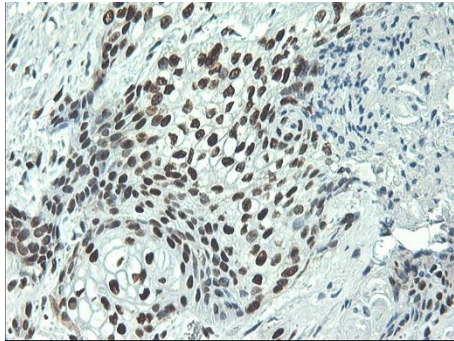

Carcinoma of bladder

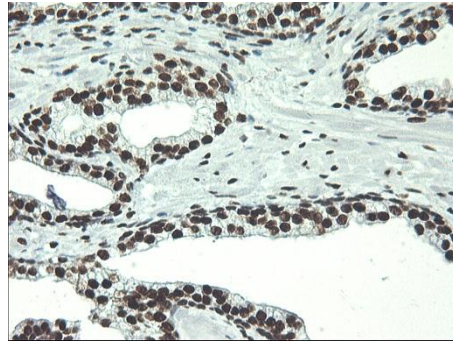

Carcinoma of Prostate

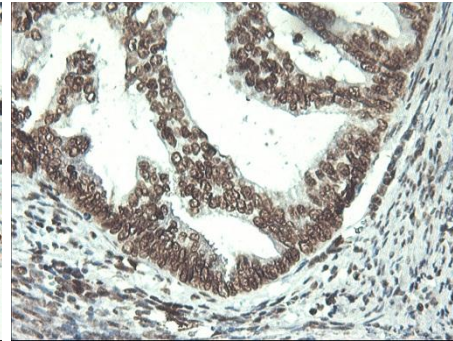

Adenocarcinoma of endometrium

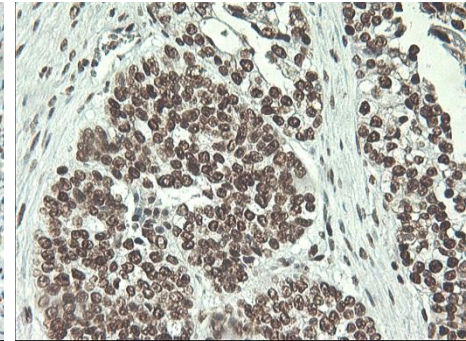

Adenocarcinoma of ovary
